# Supplementary material for: Multifunctional nanostructured membrane for clean water reclamation from wastewater with various pH conditions
Source: Royal Society of Chemistry journal article supplement (doi:10.1039/c3ra42181c), 2013-01-01
Supplement: c3ra42181c.pdf [file c3ra42181c.pdf]

## Electronic Supplementary Information

---

### **Multifunctional nanostructured membrane for reclamation from wastewater with various pH conditions**

**Peng Gao,<sup>a, b</sup> Darren Delai Sun\*<sup>a</sup> and Wun Jern Ng<sup>a, b</sup>**

<sup>a</sup>School of Civil and Environmental Engineering, Nanyang Technological University, 50 Nanyang Avenue, Singapore 639798, Singapore

<sup>b</sup>Nanyang Environment & Water Research Institute, Nanyang Technological University, 50 Nanyang Avenue, Singapore 639798, Singapore

## Electronic Supplementary Information

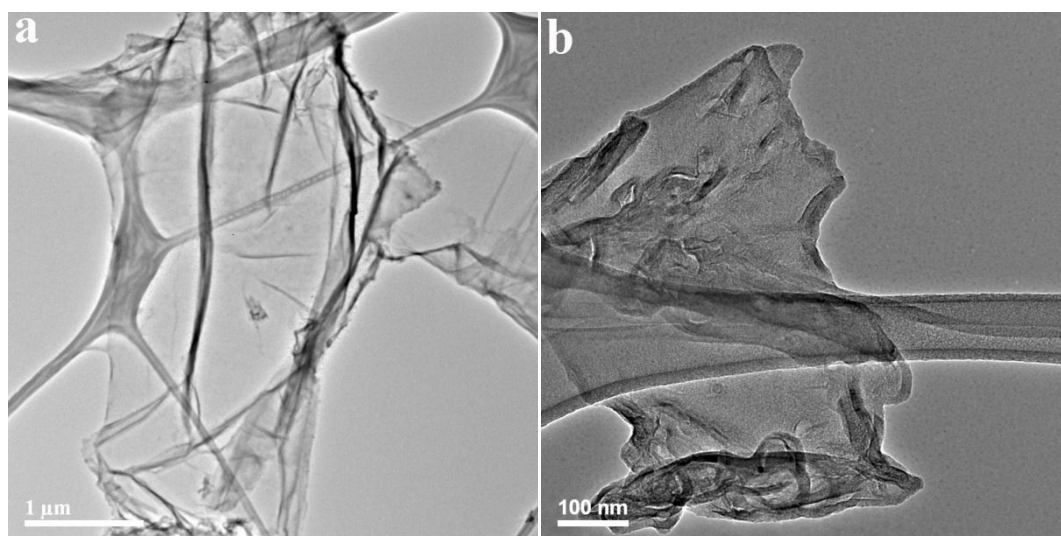

**Figure S1** | (a) and (b) TEM images of GO and GO-SO<sub>3</sub>H sheets, respectively.

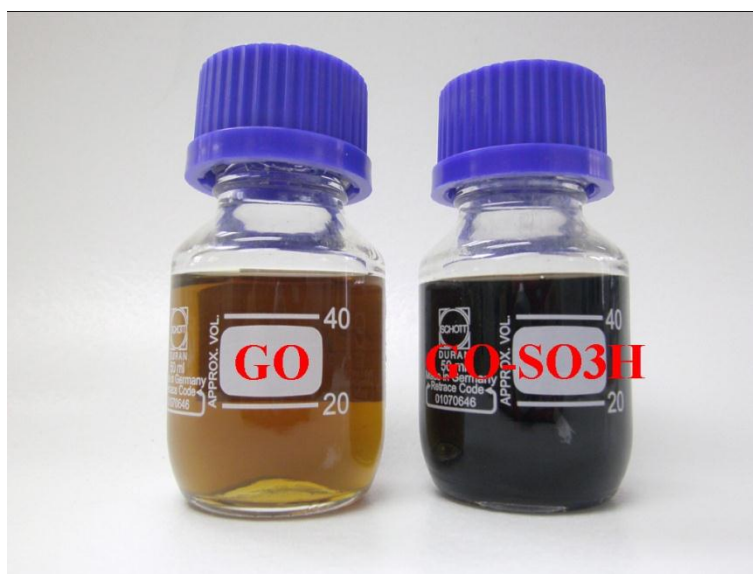

**Figure S2** | Digital photo of GO and GO-SO<sub>3</sub>H solution.

## Electronic Supplementary Information

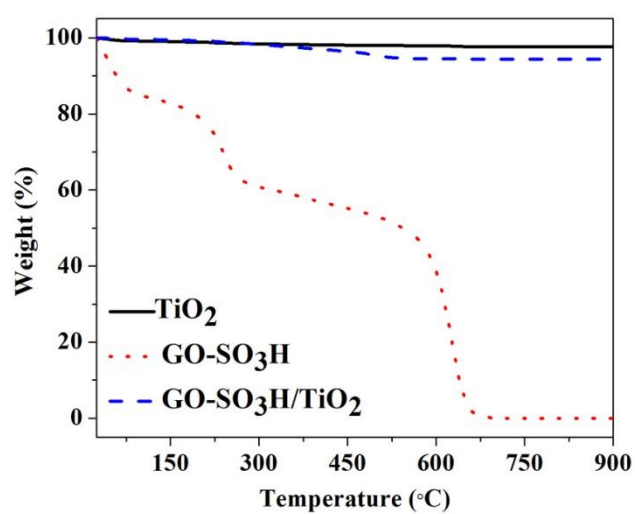

**Figure S3** | TGA curves of TiO<sub>2</sub>, GO-SO<sub>3</sub>H and GO-SO<sub>3</sub>H/TiO<sub>2</sub>.

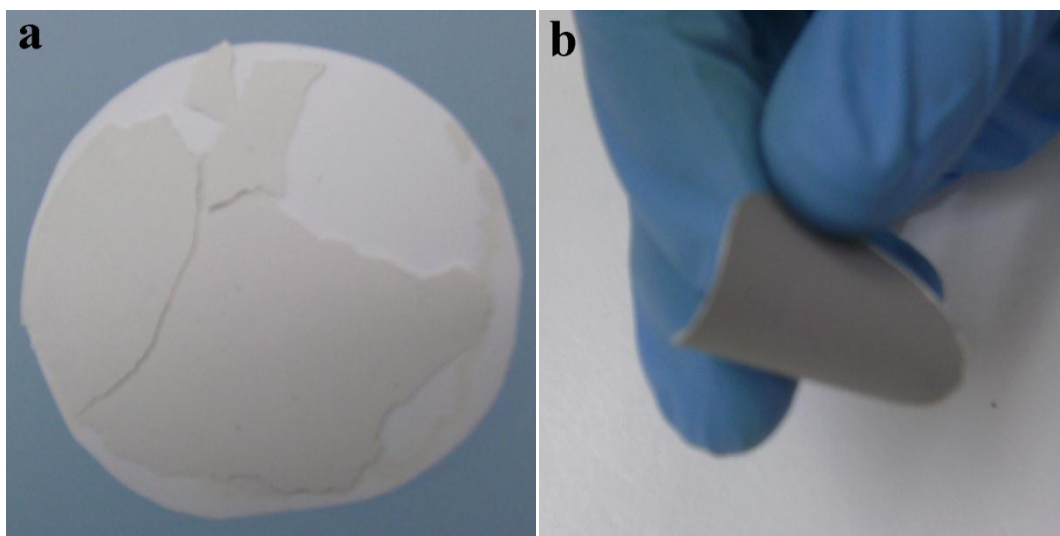

**Figure S4** | (a) and (b) Digital photos of pure TiO<sub>2</sub> membrane and GO-SO<sub>3</sub>H/TiO<sub>2</sub> membrane, respectively.

## Electronic Supplementary Information

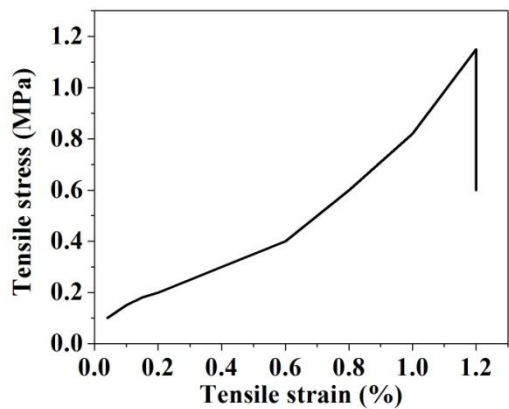

**Figure S5** | The tensile test measurement of GO-SO<sub>3</sub>H/TiO<sub>2</sub> membrane.

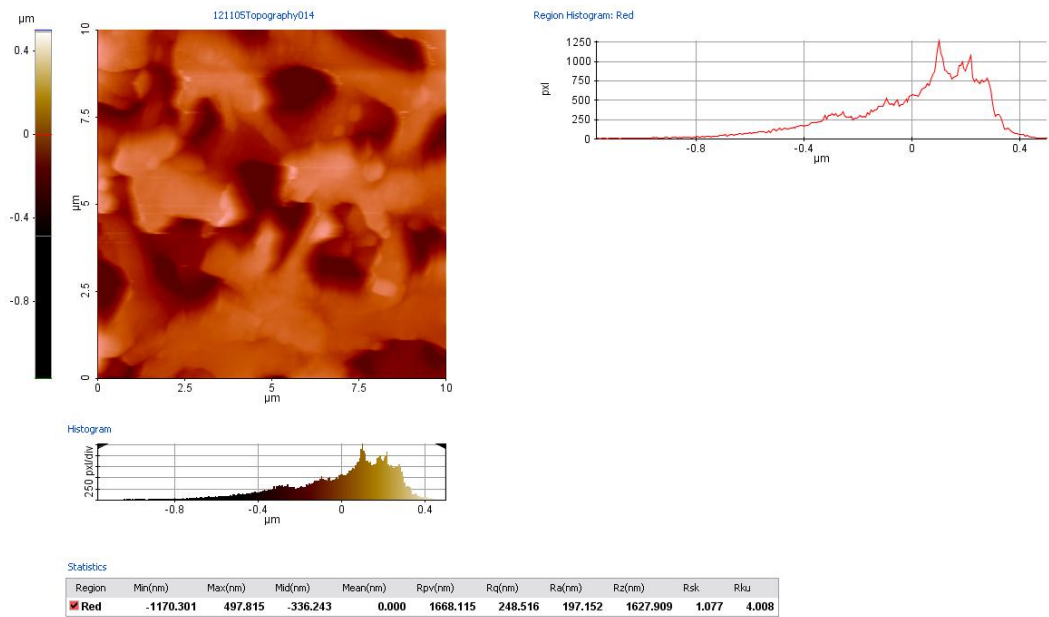

**Figure S6** | AFM image of GO-SO<sub>3</sub>H/TiO<sub>2</sub> membrane.

## Electronic Supplementary Information

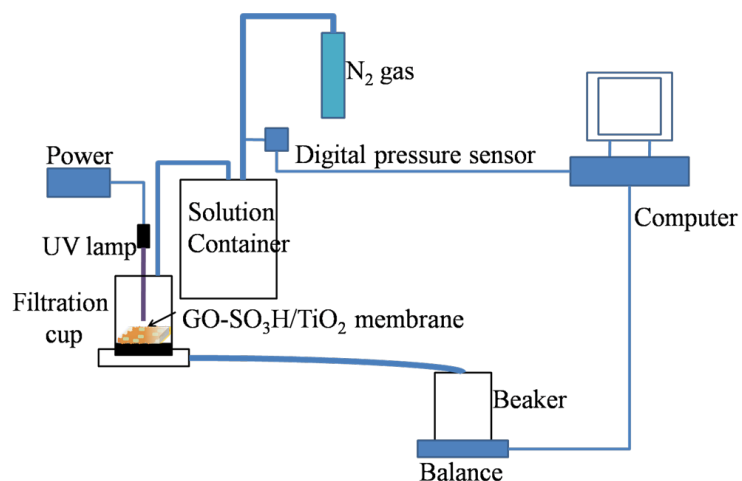

**Figure S7** | Schematic diagram of lab-scale dead end water filtration setup.

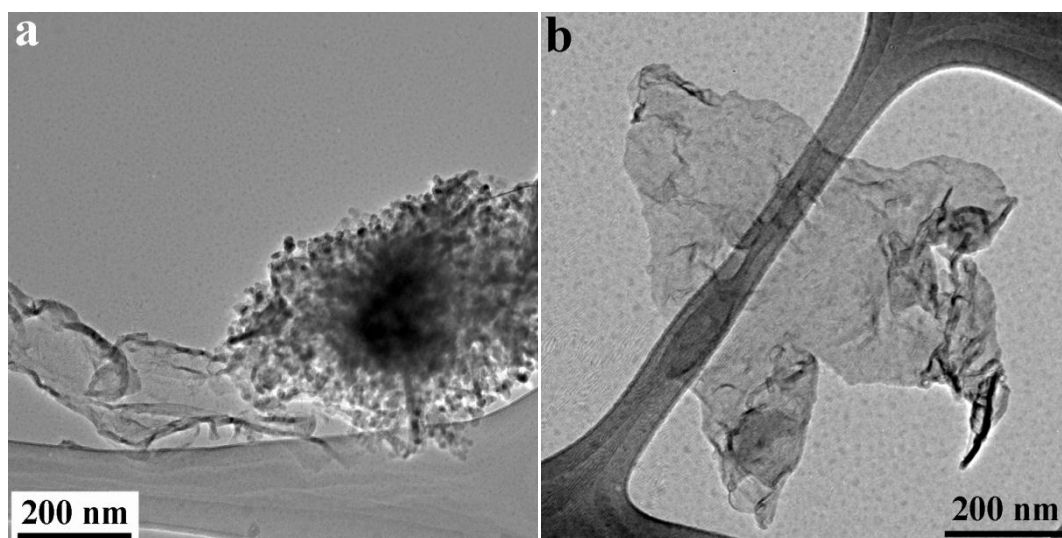

**Figure S8** | (a) and (b) TEM images of GO/TiO<sub>2</sub> after water purification under pH=11.
